# Supplementary material for: Sensitized ZnO nanorod assemblies to detect heavy metal contaminated phytomedicines: spectroscopic and simulation studies
Source: Royal Society of Chemistry journal article supplement (doi:10.1039/c6cp08016b), 2016-12-20
Supplement: c6cp08016b1.pdf [file c6cp08016b1.pdf]

**Supporting Information**

**Sensitized ZnO Nanorod assemblies to detect heavy metal contaminated  
phytomedicines: Spectroscopic and Simulation Studies**

Damayanti Bagchi<sup>1</sup>, Tuhin Kumar Maji<sup>1</sup>, Samim Sardar<sup>1</sup>, Peter Lemmens<sup>2</sup>, Chinmoy  
Bhattacharya<sup>3</sup>, Debjani Karmakar<sup>4</sup> and Samir Kumar Pal\*<sup>1</sup>

*<sup>1</sup>Department of Chemical, Biological and Macromolecular Sciences, S. N. Bose National  
Centre for Basic Sciences, Block JD, Sector III, Salt Lake, Kolkata 700 106, India*

*<sup>2</sup>Institute for Condensed Matter Physics, TU Braunschweig,  
Mendelssohnstraße 3, 38106 Braunschweig, Germany and Laboratory for Emerging  
Nanometrology, TU Braunschweig, 38106 Braunschweig, Germany*

*<sup>3</sup>Department of Chemistry, Indian Institute of Engineering Science and Technology Shibpur,  
P.O. Botanic Garden, Howrah-711103, India*

*<sup>4</sup>Technical Physics Division, Bhaba Atomic Research Centre, Mumbai 400085, India*

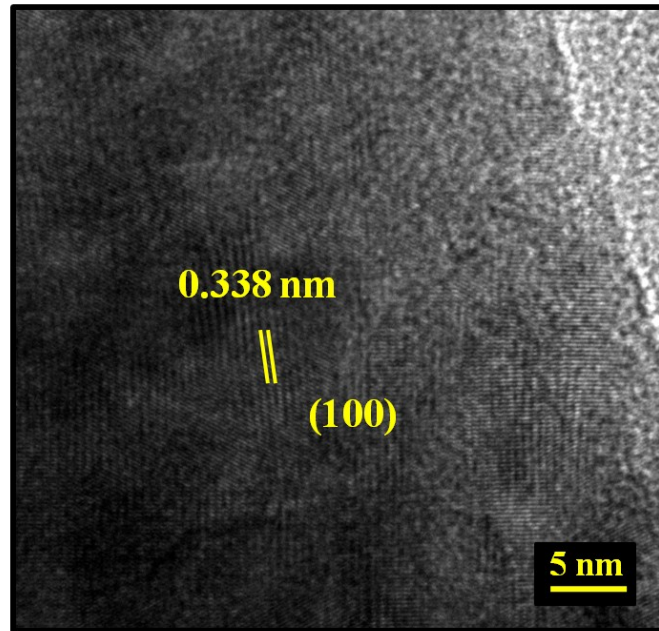

Figure S1: HRTEM image of ZnO NR. The observed inter-fringe distance of 0.338 nm is consistent with (100) planes of the ZnO NRs.

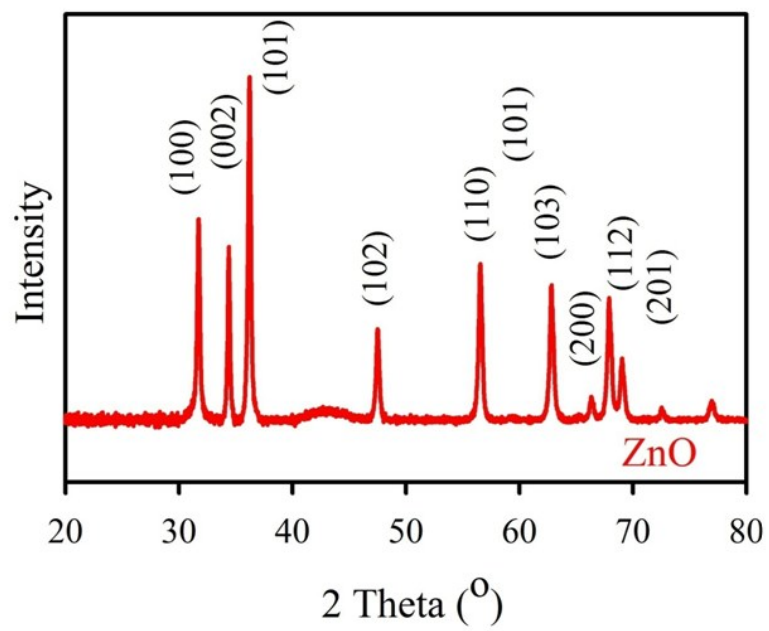

Figure S2: XRD of ZnO NRs, which is consistent with data in the literature.

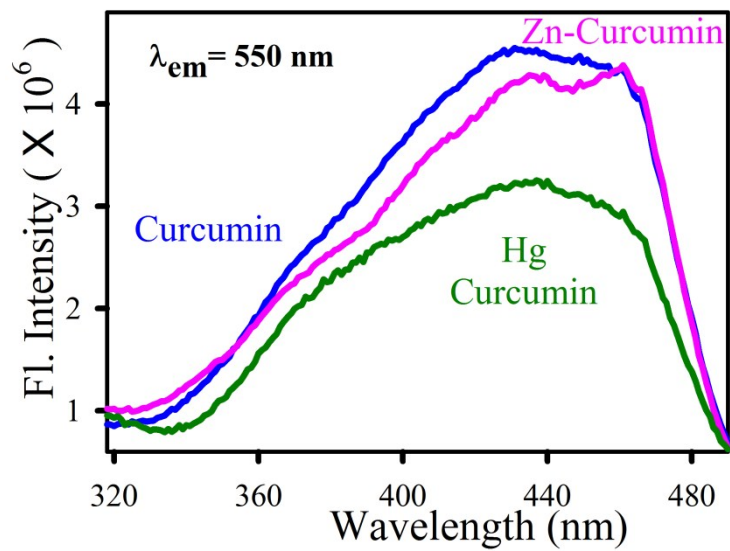

Figure S3: Excitation spectra of Curcumin (blue), Zn-Curcumin (pink) and Hg-Curcumin (green) monitoring emission at 550 nm.

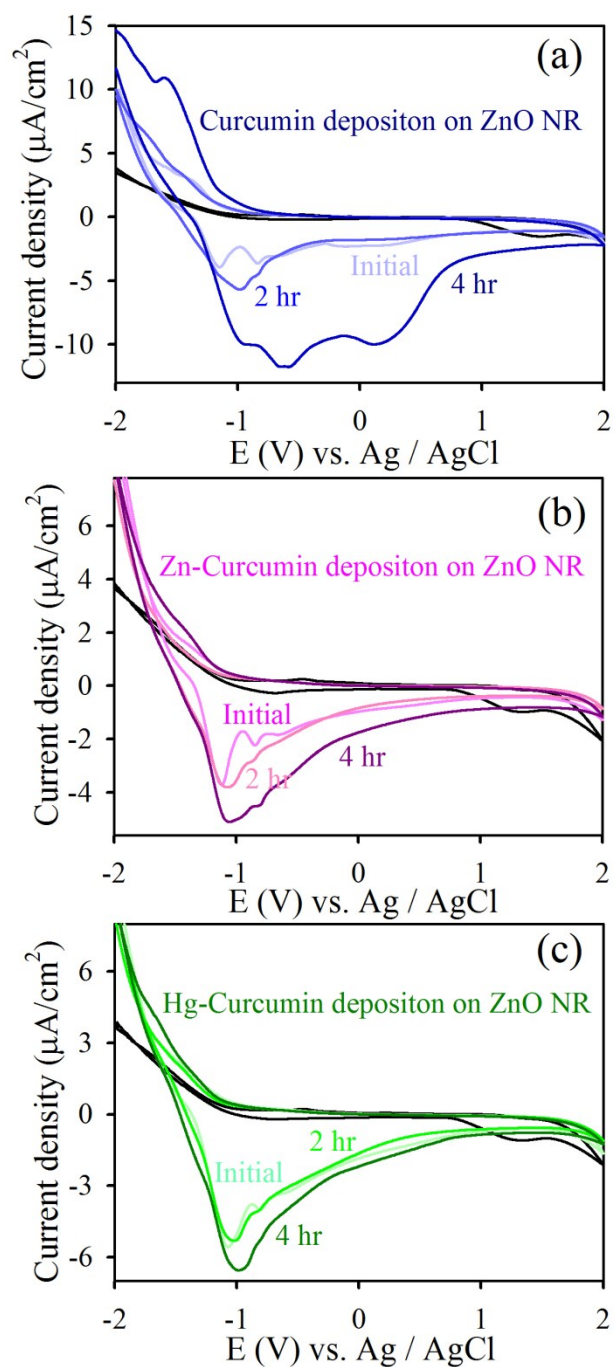

Figure S4: Cyclic voltammograms with varying time intervals initial, 2 hrs, 4 hrs of (a) Curcumin, (b) Zn-Curcumin and (c) Hg-Curcumin.

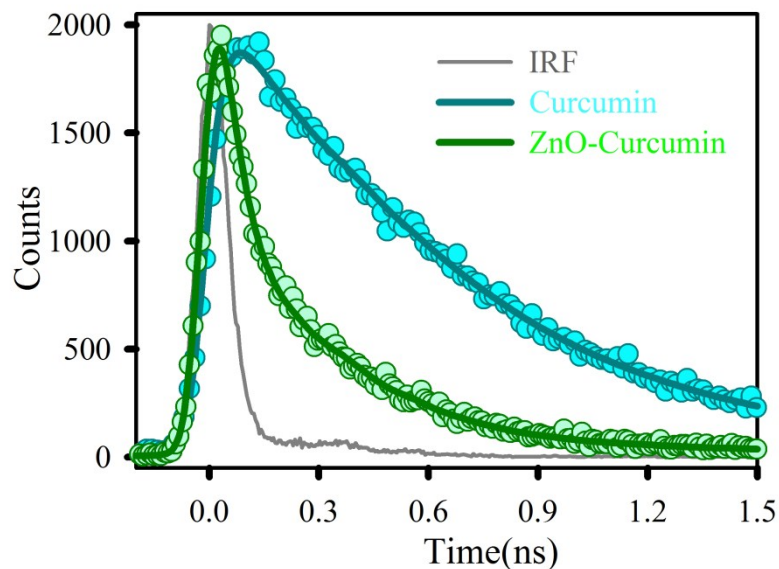

Figure S5: The picosecond-resolved fluorescence transients of Curcumin (excitation at 445 nm) in the absence (cyan) and presence of ZnO NPs (green) collected at 550 nm are shown. The lifetimes are as follows:

| Samples      | $\tau_1$ (ps) | $\tau_2$ (ps) | $\tau_{\text{avg}}$ (ps) |
|--------------|---------------|---------------|--------------------------|
| Curcumin     | 589(100%)     |               | 589                      |
| ZnO-curcumin | 30(77%)       | 257(23%)      | 82                       |

The faster timescale in ZnO-Curcumin is attributed to excited state electron transfer from Curcumin to ZnO. The IRF is 70 ps and thus excited state electron transfer from M-Curcumin to ZnO, which is even faster, cannot be determined in present experimental settings. There are plenty of literature available that suggest electron transfer process from dye (here Cur or M-Cur) to ZnO upon light irradiation.
